# Supplementary material for: Midkine release during hemodialysis is predictive of hypervolemia and associates with excess (cardiovascular) mortality in patients with end-stage renal disease: a prospective study
Source: Springer Nature journal article supplement (doi:10.1007/s11255-022-03141-4), 2022-02-24
Supplement: MOESM1 [file 20165646]

## **Supplementary material**

**Supplementary Figure 1:** Midkine stability is ascertained by storage at -80°C and preclusion of repeated freeze-thaw cycles

**Supplementary Figure 2:** Correlation of applied heparin with delta midkine levels

**Supplementary Figure 3:** Serum midkine levels before and after dialysis treatment

**Supplementary Figure 4:** Kaplan-Meier survival curves for tenascin-C and galectin

**Supplementary Figure 5:** Correlative analyses of midkine, NTproANP and uPAR

**Supplementary Figure 6:** Kaplan-Meier survival curves for ADMA

**Supplementary Figure 7:** Midkine release in patients with hypervolemia.

**Supplementary Table 1:** Fluid homeostasis assessment

**Supplementary Table 2:** ADMA, SDMA, DGMV, L-arginine serum levels did not correlate with delta midkine serum levels

**Supplementary Table 3:** Hazard Ratio for  $\Delta$ Midkine, uPAR, and ANP adjusted for age, gender, fluid status, and co-morbidity diabetes.

**Supplementary Figure 1: Midkine stability is ascertained by storage at -80°C and preclusion of repeated freeze-thaw cycles. (A)** Serum samples from 3 different patients were stored at 4°C, -20°C, or -80°C. Quantification of midkine was carried out after 4 days following immediate thawing before performance of the ELISA. **(B)** Serum samples from the same patients were stored at 4°C, -20°C, or -80°C for four days. Before quantification by midkine ELISA samples were thawed and subjected to another freezing/thawing cycle (1st thawing) and two more freezing/thawing cycles (2nd thawing). **(C)** Long term stability was tested with serum samples from two patients that were included for ELISA quantification after 2 and 3 years storage at -80°C.

**Supplementary Figure 2: Correlation of applied heparin with delta midkine levels. (A)** The doses of applied non-fractionated heparin were correlated with changes in serum midkine levels after a short ( $r^2=0.06$ ,  $p=0.03$ ) and long dialysis-free interval ( $r^2=0.17$ ,  $p<0.001$ ). **(B)** For non-fractionated heparin similar correlations of delta midkine levels after a short ( $r^2=0.002$ ,  $p=0.88$ ) and long dialysis-free interval ( $r^2=0.01$ ,  $p=0.76$ ) were performed in 12 patients (average  $2,958 \pm 1,389$  IU). The increase of midkine levels was similar after both intervals,  $17.6 \pm 17$  ng/ml and  $14.5 \pm 11.9$  ng/ml, respectively, and did not positively correlate with the dose of fractionated heparin.

**Supplementary Figure 3: Serum midkine levels before and after dialysis treatment. (A)**  $\Delta$ midkine values (midkine post – pre-hemodialysis) were calculated for the short and long interval, yielding no significant difference. Furthermore the  $\Delta\Delta$ midkine levels ( $\Delta$ midkine short interval -  $\Delta$ midkine long interval) were calculated to assess the variability of midkine changes. **(B)** For the subgroups of diabetic ( $n=33$ ) versus non-diabetic ( $n=50$ ) patients analyses were performed.  $\Delta$ midkine (midkine levels after dialysis - before dialysis) were calculated for the short and long dialysis-free interval. **(C)** For the subgroups of patients diagnosed with hypervolemia ( $n=51$ ) versus euolemia ( $n=32$ ),  $\Delta$ midkine (serum midkine levels after dialysis - before dialysis) were calculated for the short and long dialysis-free interval. Here, significant differences for the subgroup comparisons were confirmed. **(D)** ROC curve analyses showing the prognostic power of absolute midkine values or  $\Delta$ midkine values to predict diabetes (cohort with  $n=70$  diagnosed with diabetes;  $n=101$  without diabetes),

hypervolemia (cohort with n=83 diagnosed with hypervolemia; n=88 without hypervolemia). In the last panels prediction of both conditions combined is tested (cohort with n=32 diagnosed with diabetes and hypervolemia; n=51 without diabetes and hypervolemia). AUC, area under the curve. **(E)** ROC curve analyses showing the prognostic power of  $\Delta$ midkine values with binary logistic regression performed following short and long dialysis-free intervals to diagnose hypervolemia. Selected cut-off points for  $\Delta$ midkine of the short and long intervals are indicated.

**Supplementary Figure 4: Kaplan-Meier survival curves for tenascin-C and galectin.** Serum concentrations of tenascin-C **(A, B)** and galectin **(C,D)** were determined. Kaplan-Meier survival curves indicate that both parameters are not predictive for overall survival.

**Supplementary Figure 5: Correlative analyses of midkine, NTproANP and uPAR.** NTproANP and uPAR serum concentrations were correlated (Pearson) with absolute midkine serum values in the whole dialysis cohort **(A,C)** or selected patients diagnosed with diabetes **(B,D)**.

**Supplementary Figure 6: Kaplan-Meier survival curves for ADMA.** **(A)** Patients with less-than-average ADMA serum levels before the long dialysis-free interval (group 1) were compared with those having above-average ADMA levels (group 2). Over a 36 months observation period, censoring was performed for overall mortality and **(B)** cardiovascular mortality.

**Supplementary Figure 7. Effect of fluid removal on midkine release in patients with hypervolemia.** In patients diagnosed with hypervolemia (n=21) appropriate fluid management was planned by increasing net fluid removal during dialysis sessions. Serum midkine levels after long dialysis-free intervals were quantified. 8/21 patients successfully removed additional 0.5-1.0 kg (n=3) or >1.0 kg (n=5). **(A)**  $\Delta$ Midkine levels were calculated as maximal difference to baseline in the 3 week intervention period with subgrouping according to weight loss: >0.5 to 1.0 kg and >1.0 kg. **(B)** Change of midkine values calculated as [%] change to baseline values again with subgrouping according to weight loss: >0.5 to 1.0 kg and >1.0 kg.

# Supplementary Figure 1

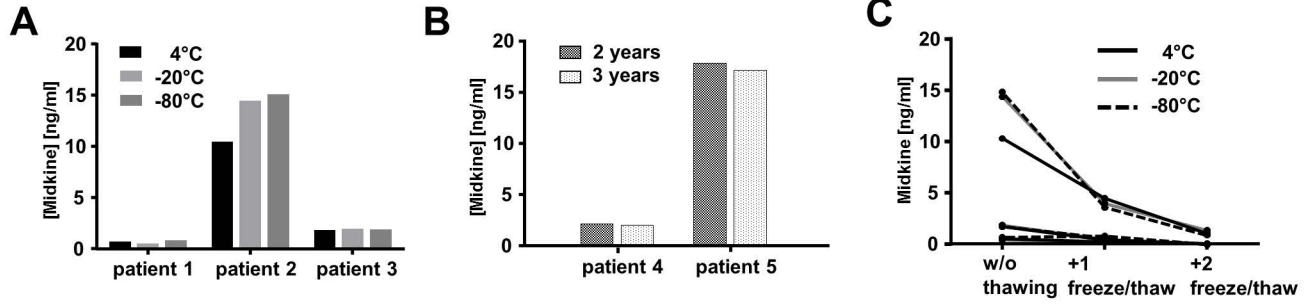

Supplementary Figure 2

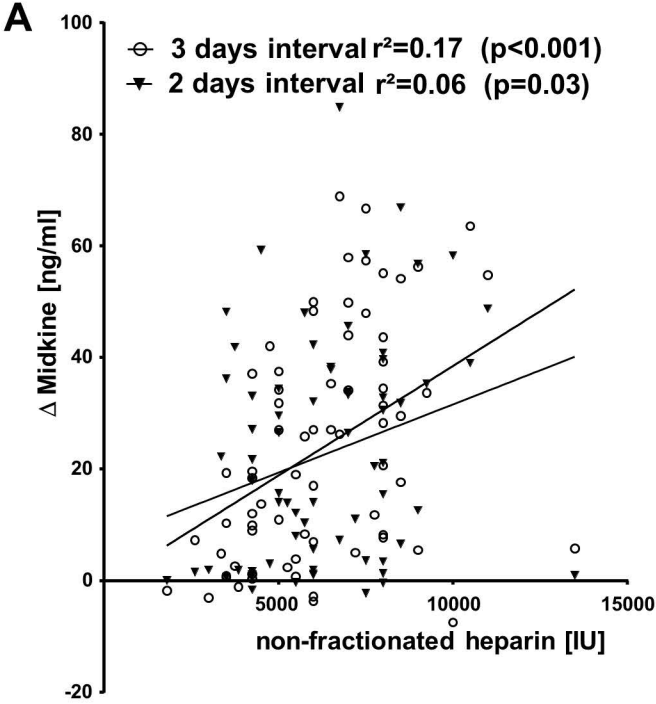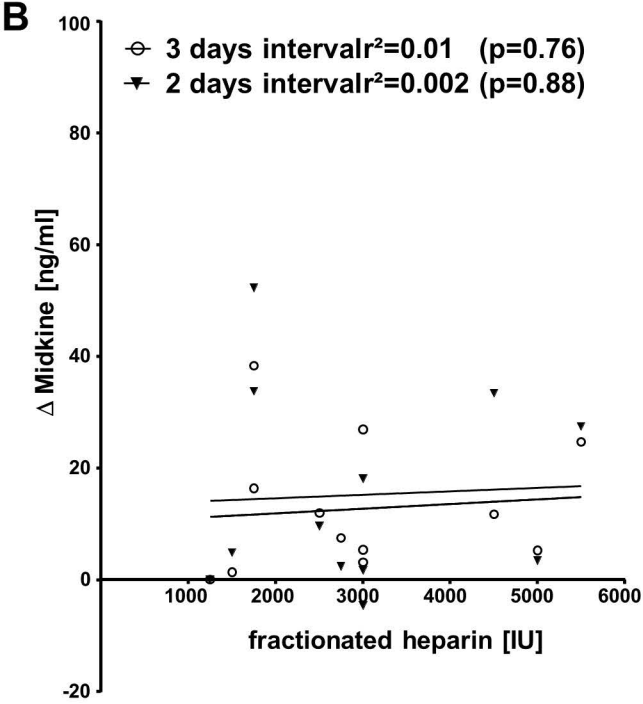

# Supplementary Figure 4

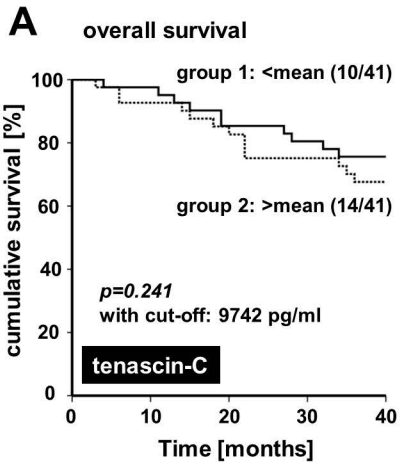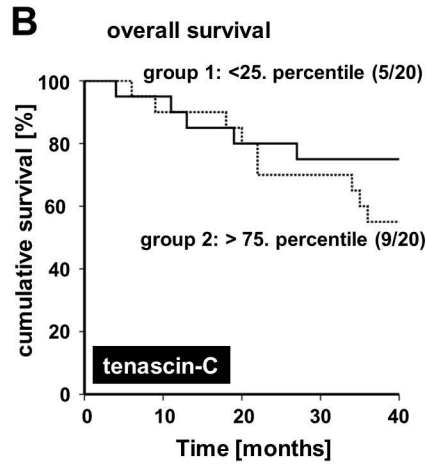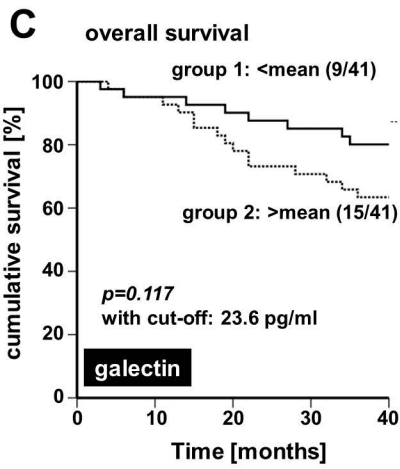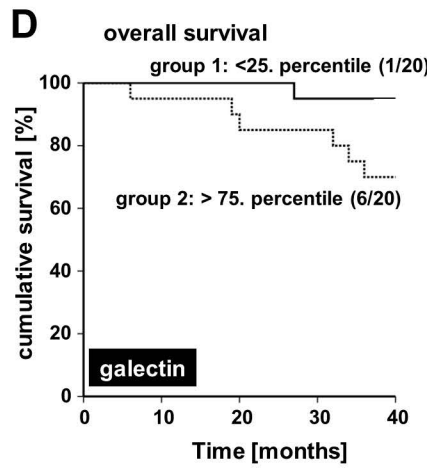

# Supplementary Figure 3

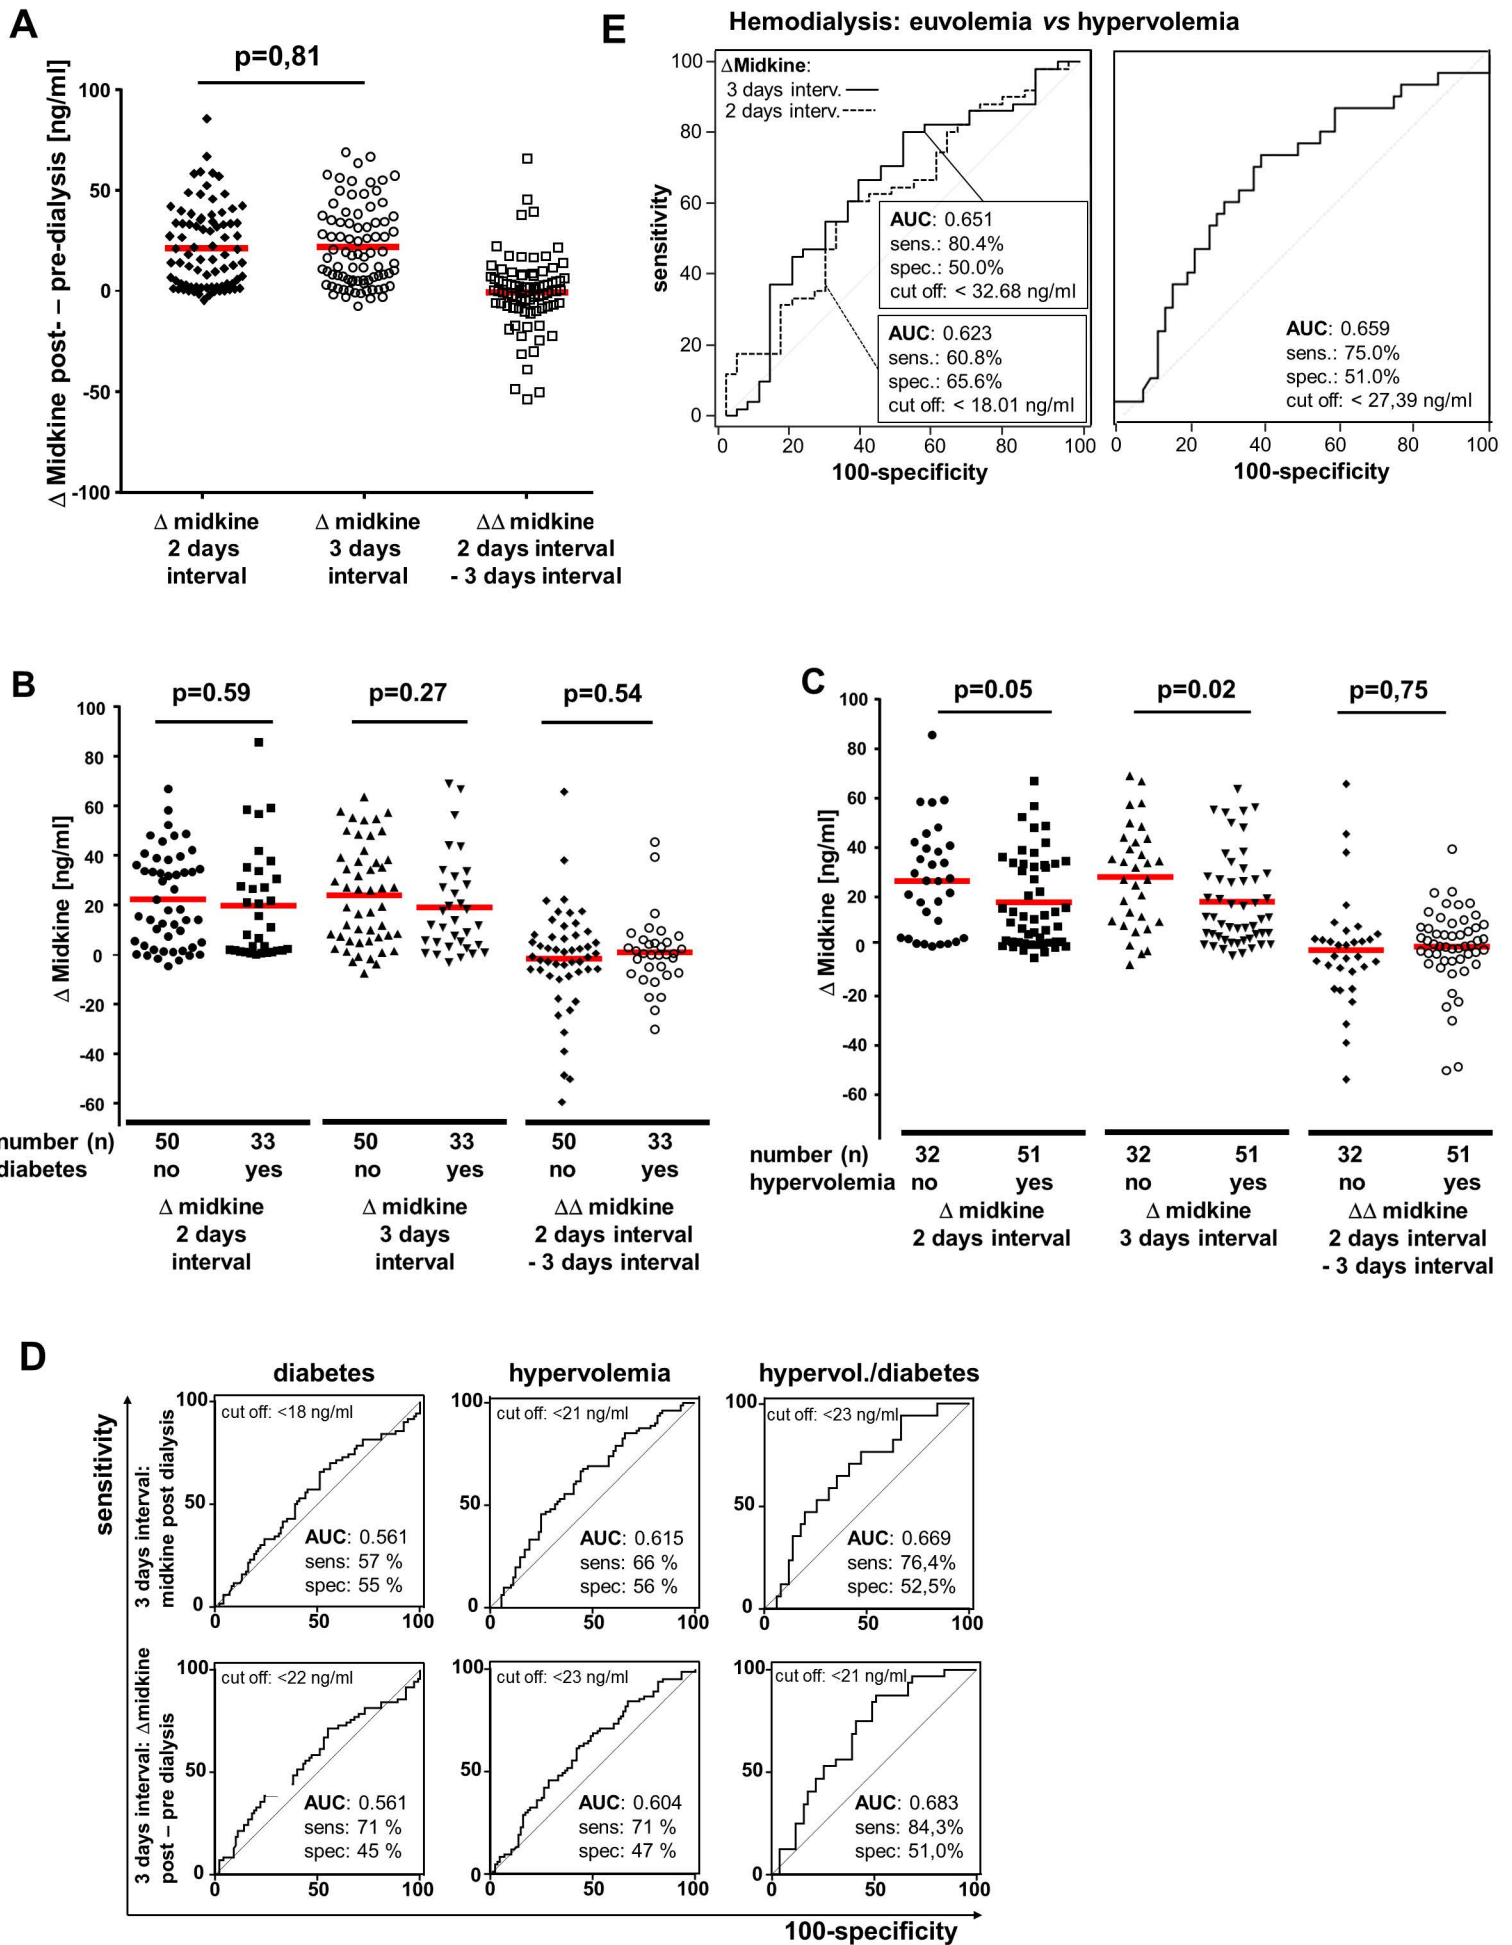

# Supplementary Figure 5

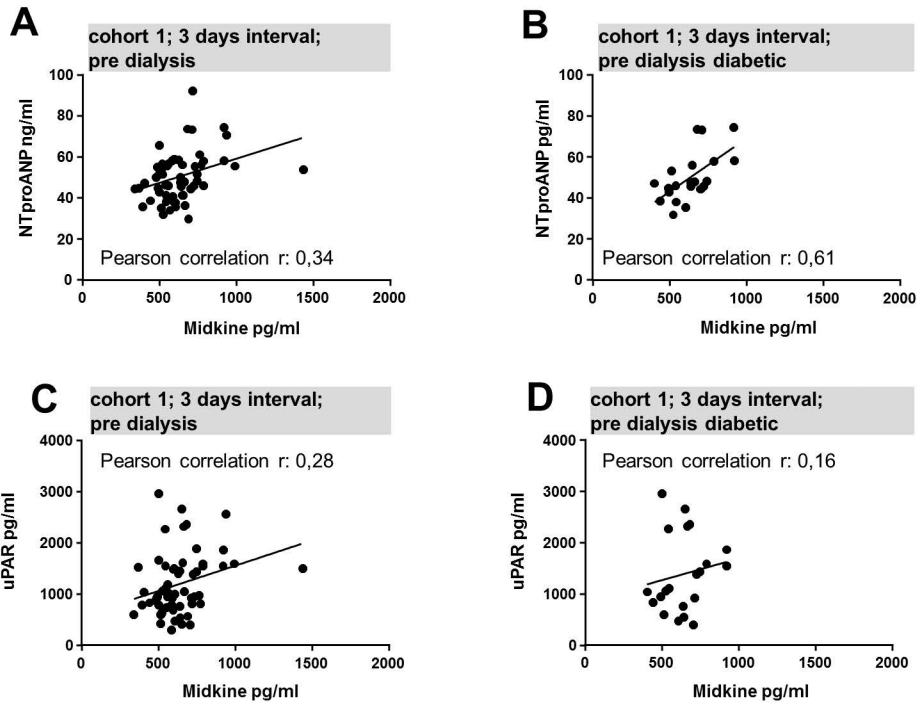



# Supplementary Figure 6

**A** overall survival

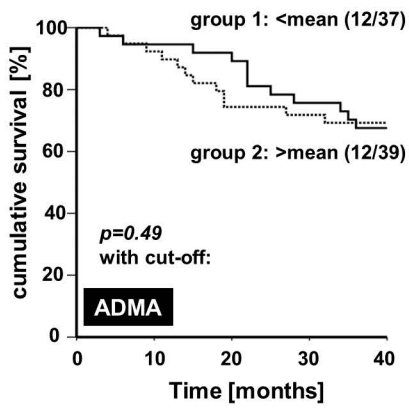

**B** overall survival

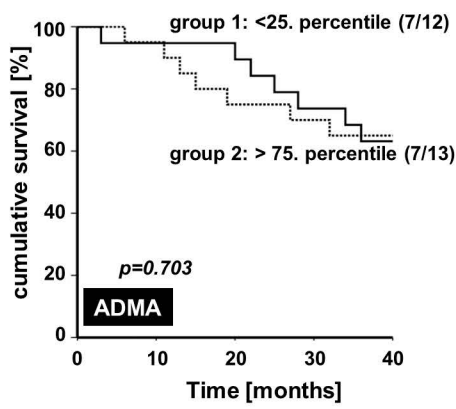

**C** cardiovascular mortality

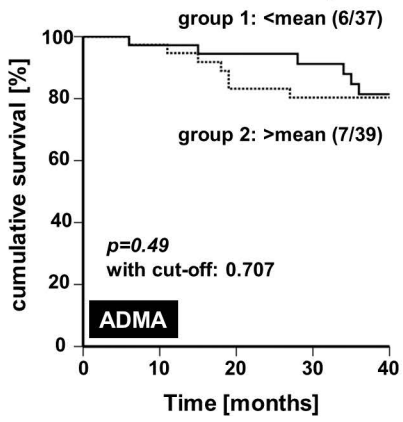

**D** cardiovascular mortality

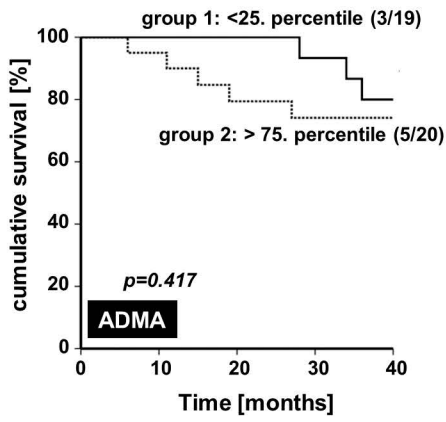

# Supplementary Figure 7

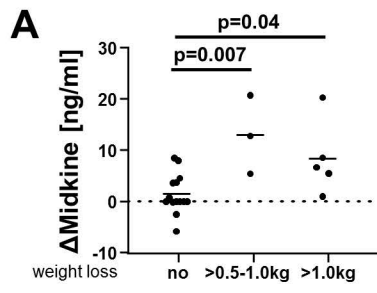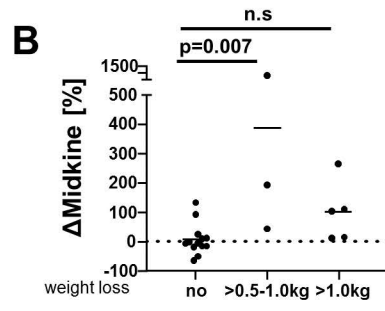

## Supplementary Table 1

### Fluid homeostasis assessment

|                               | hypervolemia defined by  |                                |                            |
|-------------------------------|--------------------------|--------------------------------|----------------------------|
|                               | comet tail sign<br>lungs | elevated weight<br>(> +0.5 kg) | V. cava diameter<br>> 20mm |
| <b>number of patients (n)</b> | 11                       | 38                             | 22                         |

## Supplementary Table 2

### ADMA, SDMA, DGMV, L-arginine, delta midkine serum levels

| Delta Midkine                    | 3 days interval<br>above mean [24,9 ng/ml]<br>n=42 | 3 days interval<br>below mean [24,9 ng/ml]<br>n=41 | p-value |
|----------------------------------|----------------------------------------------------|----------------------------------------------------|---------|
| ADMA [ $\mu\text{mol/l}$ ]       | 0.49 $\pm$ 0.99                                    | 0.49 $\pm$ 0.09                                    | 0.88    |
| SDMA [ $\mu\text{mol/l}$ ]       | 1.28 $\pm$ 0.36                                    | 1.33 $\pm$ 0.1                                     | 0.65    |
| DGMV [mmol/l]                    | 334.96 $\pm$ 218.34                                | 356.07 $\pm$ 385.85                                | 0.77    |
| L-arginine [ $\mu\text{mol/l}$ ] | 22.78 $\pm$ 9.4                                    | 24.11 $\pm$ 20.7                                   | 0.72    |

**Supplementary Table 3.** HR for  $\Delta$ Midkine, uPAR, and ANP adjusted for age, gender, fluid status, and diabetes. (Abbreviations: *CI*, confidence interval; *HR*, hazard ratio.)

|                                          | <b>HR</b>    | <b>95% CI</b>        |
|------------------------------------------|--------------|----------------------|
| <b><math>\Delta</math>Midkine</b>        |              |                      |
| HR <sub>Age</sub>                        | <b>1.059</b> | <b>1.026 - 1.094</b> |
| HR <sub>Gender</sub>                     | 0.905        | 0.447 - 1.830        |
| HR <sub>Hypervolemia</sub>               | 1.367        | 0.652 - 2.863        |
| HR <sub>Diabetes</sub>                   | 0.898        | 0.457 - 1.762        |
| HR <sub><math>\Delta</math>Midkine</sub> | <b>2.204</b> | <b>1.244 - 3.641</b> |
| <b>uPAR</b>                              |              |                      |
| HR <sub>Age</sub>                        | <b>1.052</b> | <b>1.017 - 1.088</b> |
| HR <sub>Gender</sub>                     | 1.083        | 0.533 - 2.199        |
| HR <sub>Hypervolemia</sub>               | 1.720        | 0.824 - 3.592        |
| HR <sub>Diabetes</sub>                   | 0.987        | 0.501 - 1.943        |
| HR <sub>uPAR</sub>                       | <b>2.421</b> | <b>1.153 - 5.086</b> |
| <b>ANP</b>                               |              |                      |
| HR <sub>Age</sub>                        | <b>1.055</b> | <b>1.022 - 1.090</b> |
| HR <sub>Gender</sub>                     | 0.951        | 0.468 - 1.934        |
| HR <sub>Hypervolemia</sub>               | 1.729        | 0.833 - 3.590        |
| HR <sub>Diabetes</sub>                   | 1.036        | 0.529 - 2.029        |
| HR <sub>ANP</sub>                        | 1.352        | 0.678 - 2.697        |
